# Supplementary material for: SH-29 and SK-119 Attenuates Air-Pollution Induced Damage by Activating Nrf2 in HaCaT Cells
Source: MDPI journal article supplement (doi:10.3390/ijerph182312371), 2021-11-24
Supplement: s1 [file s1]

# SH-29 and SK-119 Attenuates Air-Pollution Induced Damage by Activating Nrf2 in HaCaT Cells

Shirin Kahremany <sup>1,2</sup>, Lukas Hofmann <sup>1</sup>, Noy Eretz-Kdosha <sup>2</sup>, Eldad Silberstein <sup>3</sup>, Arie Gruzman <sup>1,\*</sup> and Guy Cohen <sup>2,4,\*</sup>

<sup>1</sup> Department of Chemistry, Faculty of Exact Sciences, Bar-Ilan University, Ramat-Gan 5290002, Israel; shirin.kahremany@live.biu.ac.il (S.K.); lukas.hofmman@biu.ac.il (L.H.)

<sup>2</sup> The Dead Sea and Arava Science Center, The Skin Research Institute, Masada 8691000, Israel; noy@adssc.org

<sup>3</sup> Department of Plastic Surgery, Soroka University Medical Center, Ben-Gurion University of the Negev, Beer-Sheva 8410100, Israel; eldads@bgu.ac.il

<sup>4</sup> Eilat Campus, Ben Gurion University of the Negev, Eilat 8855630, Israel

\* Correspondence: gruzmaa@biu.ac.il (A.G.); guy@adssc.org (G.C.)

This PDF file includes:

|                                                  |   |
|--------------------------------------------------|---|
| I. Scheme S1: Synthesis of SH-29 and SK-119..... | 2 |
| II. NMR spectra .....                            | 3 |
| III. Mass Spectrometry analytical data.....      | 7 |

## I. Scheme S1: Synthesis of SH-29 and SK-119

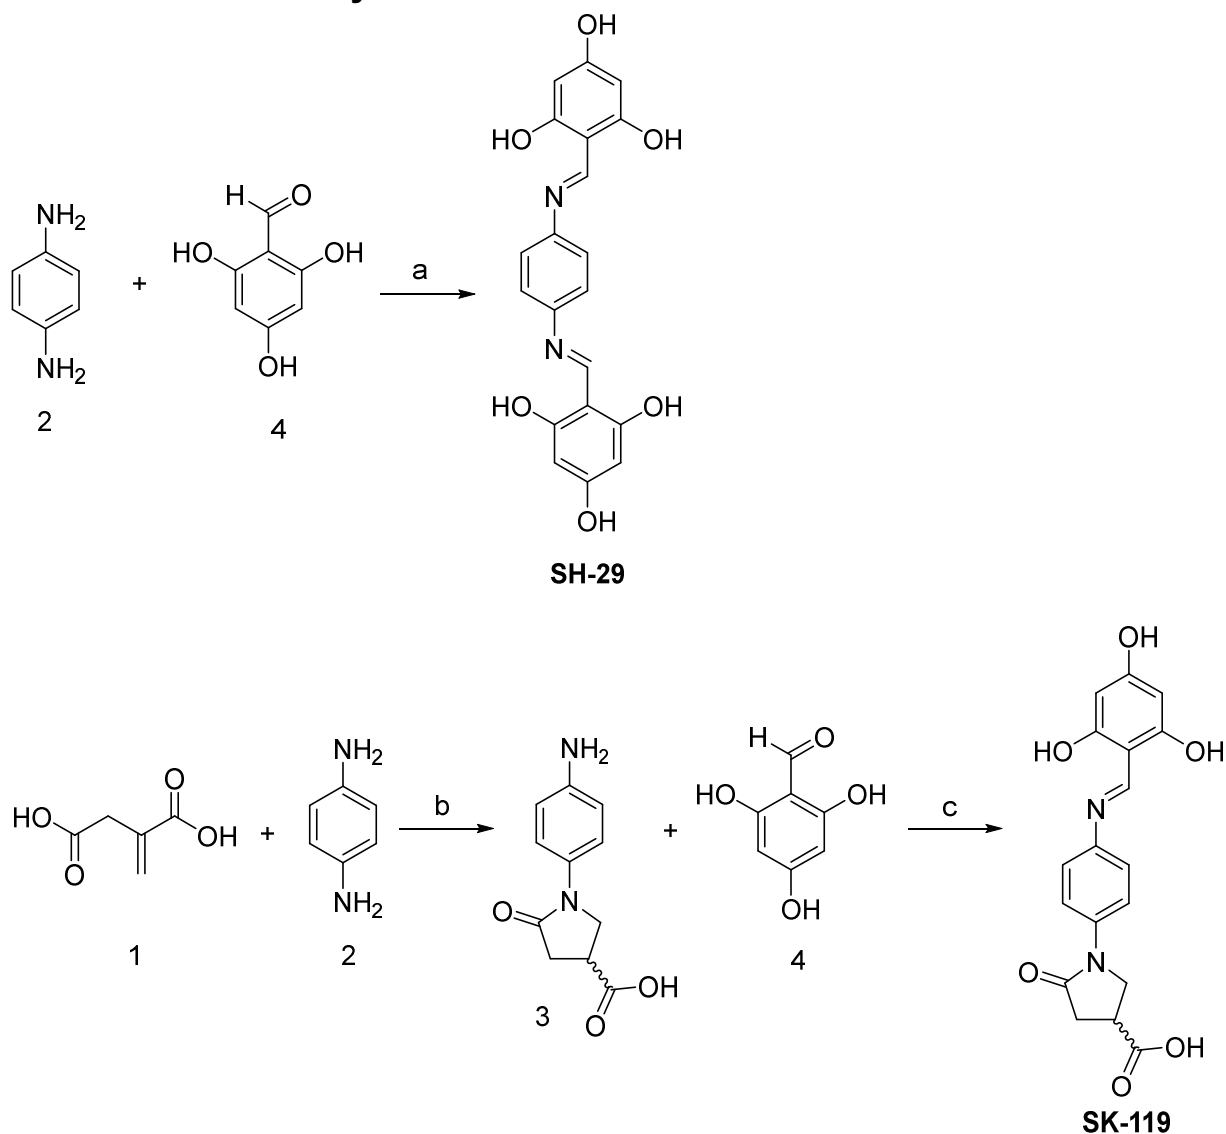

Synthetic procedure for the preparation of compounds SH-29 and SK-119. a) phenylenediamine (2), 2,4,6-trihydroxybenzaldehyde (4), EtOH, 5 h, r.t. b) itaconic acid (1), phenylenediamine (2), H<sub>2</sub>O, reflux 1 h. c) EtOH, compound 3, 2,4,6-trihydroxybenzaldehyde (4), RT overnight.

## II. NMR spectra

2,2'-((1E,1'E)-(1,4-phenylenebis(azaneylylidene)))bis(methaneylylidene))bis(benzene-1,3,5-triol), **SH-29**

### I. <sup>1</sup>H-NMR (400 MHz, DMSO)

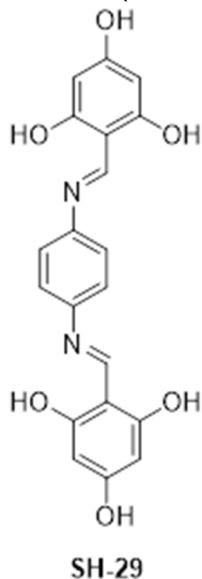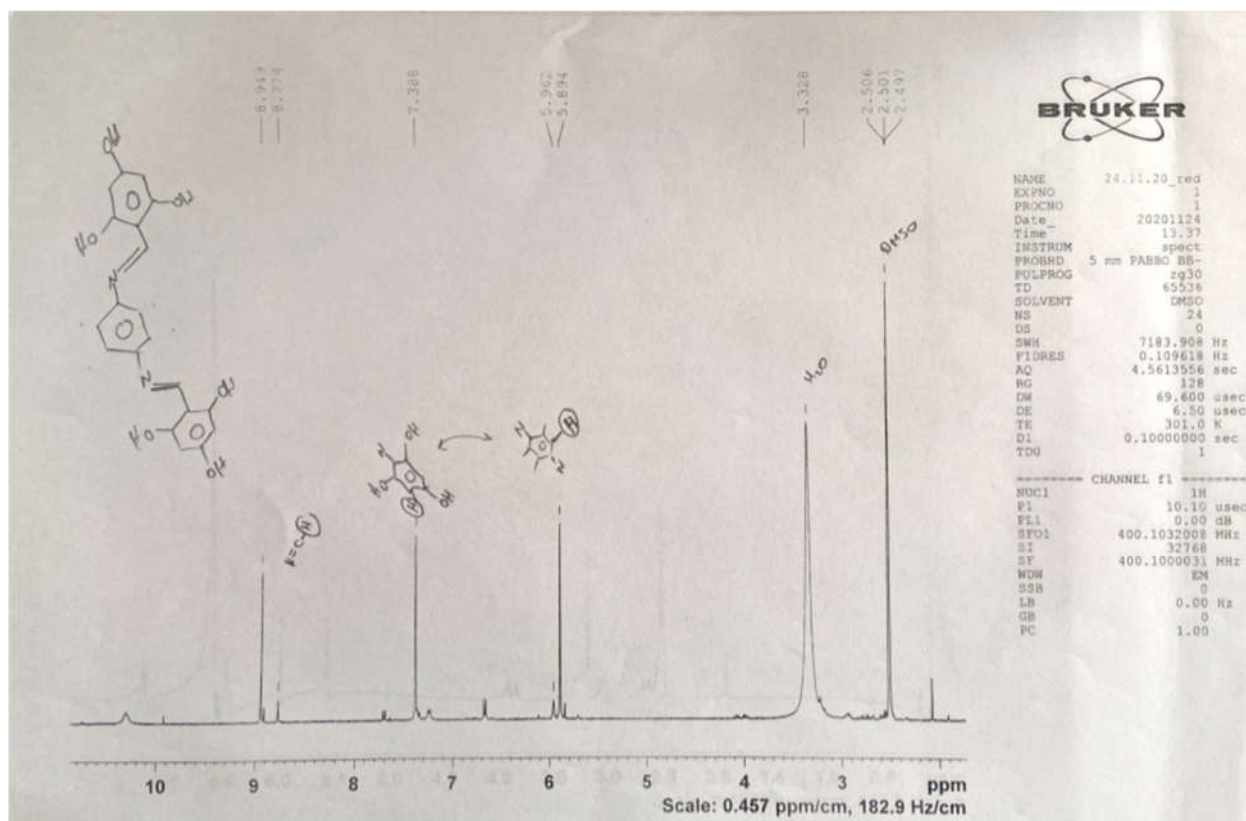

## II. $^{13}\text{C}$ -NMR(400 MHz, DMSO)

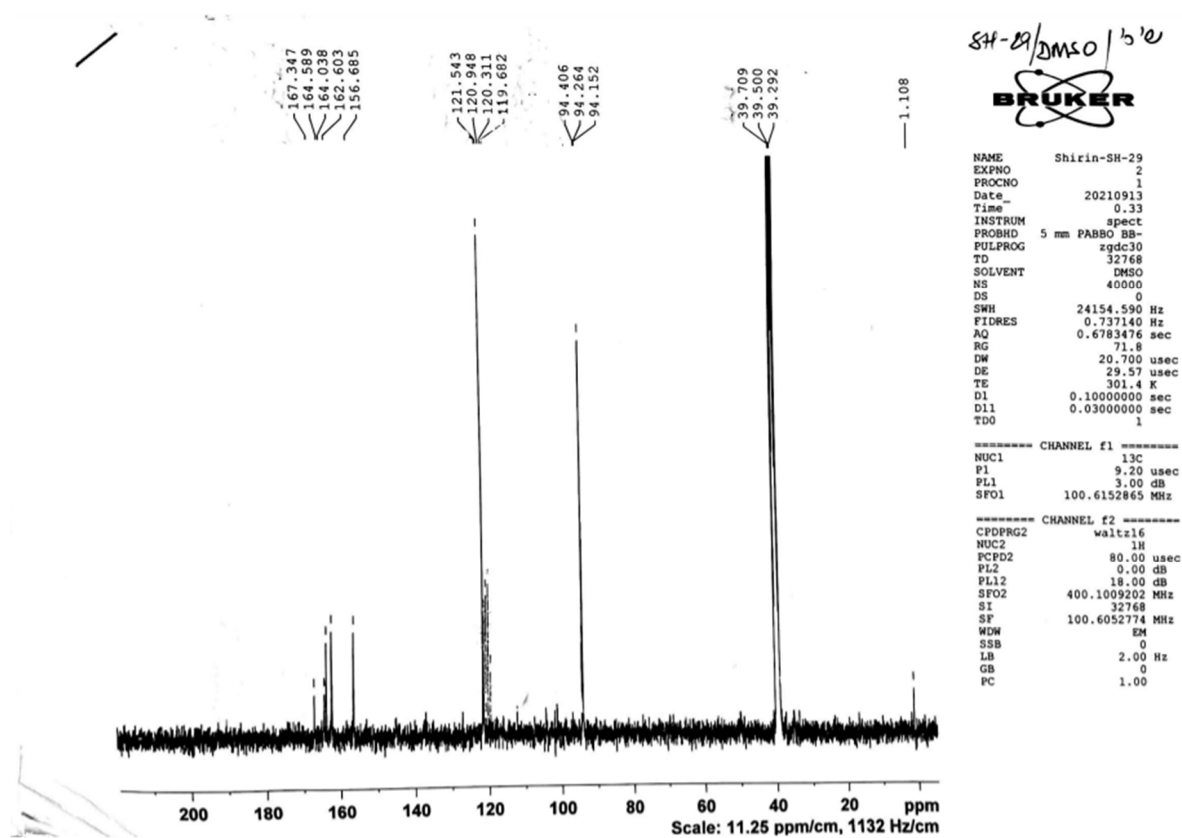

NMR assignment was previously reported [1]

5-oxo-1-(4-((2,4,6-trihydroxybenzylidene)amino)phenyl)pyrrolidine-3-carboxylic acid, **SK-119**

III.  $^1\text{H}$ -NMR (400 MHz, DMSO)

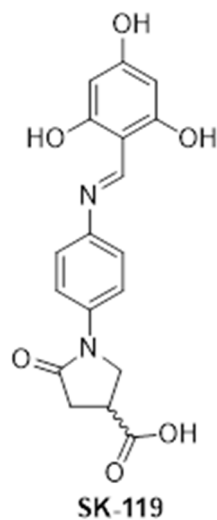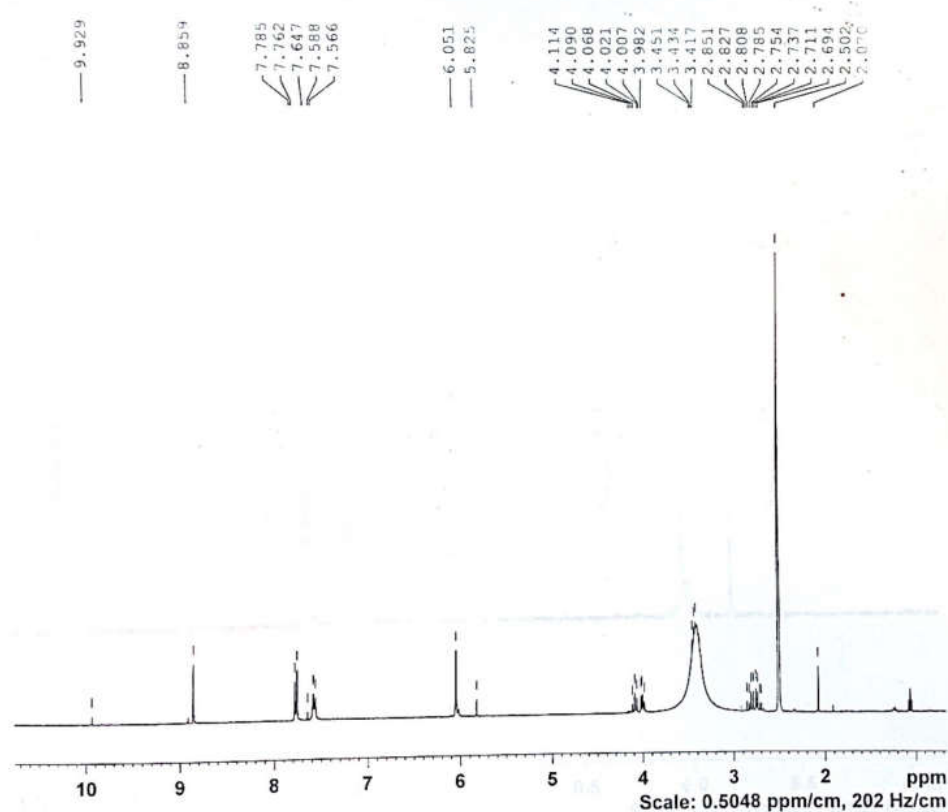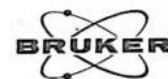

17m1  
Elz  
SK-119

```

NAME      24.11.20
EXPNO     1
PROCNO    1
Date_     20201124
Time      13.27
INSTRUM    spect
PROBHD     5 mm PABBO BB-
PULPROG    zg30
TD         65536
SOLVENT    DMSO
NS          24
DS          0
SWH         7183.908 Hz
FIDRES      0.109618 Hz
AQ          4.5613556 sec
RG          128
DW          69.600 usec
DE          6.50 usec
TE          301.0 K
D1          0.10000000 sec
TD0         1
  
```

```

===== CHANNEL f1 =====
NUC1       1H
P1         10.10 usec
PL1        0.00 dB
SFO1       400.1032008 MHz
SI         32768
SF         400.1000029 MHz
WDW        EM
SSB        0
LB         0.00 Hz
GB         0
PC         1.00
  
```

IV.  $^{13}\text{C}$ -NMR(400 MHz, DMSO)

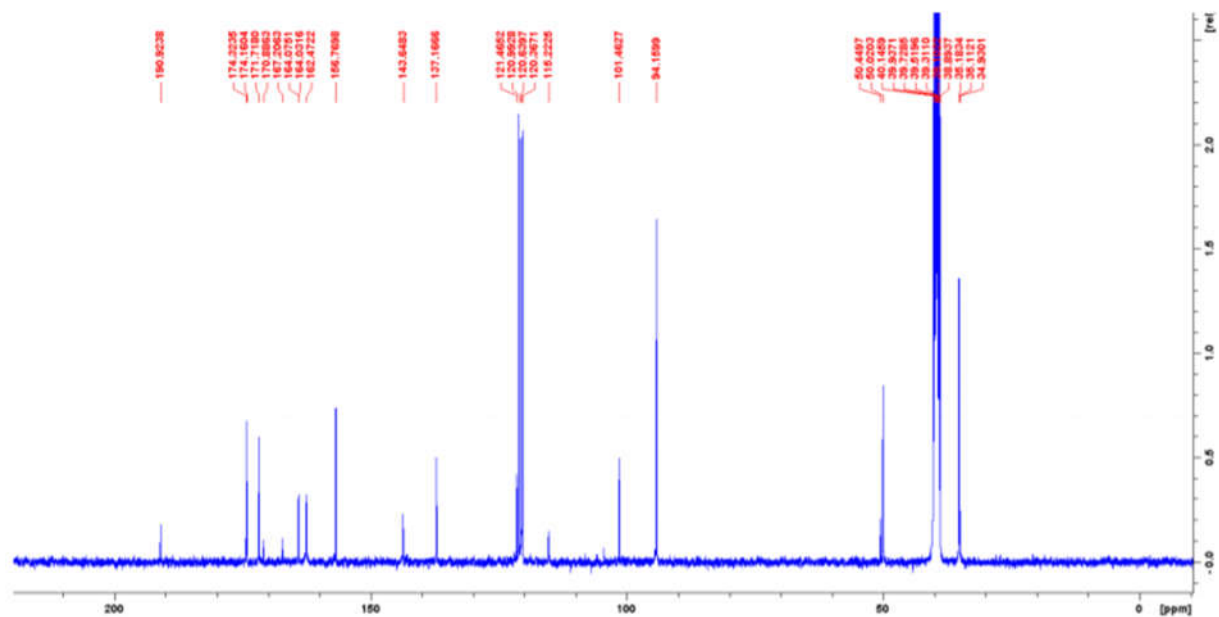

### III. Mass Spectrometry analytical data

2,2'-((1E,1'E)-(1,4-phenylenebis(azaneylylidene))bis(methaneylylidene))bis(benzene-1,3,5-triol),  
SH-29

#### Qualitative Compound Report

| Compound Label       | m/z     | RT  | Algorithm       | Mass     |
|----------------------|---------|-----|-----------------|----------|
| Cpd 1: C20 H16 N2 O6 | 379.093 | 0.6 | Find By Formula | 380.1007 |

MS Spectrum

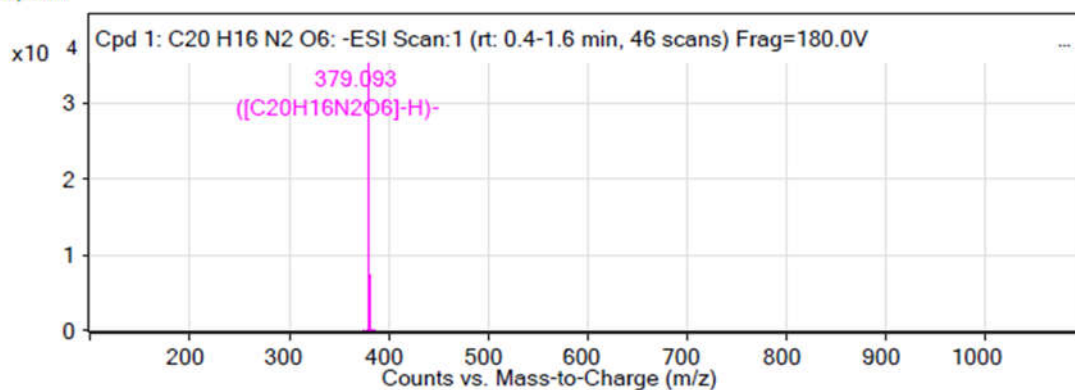

MS Zoomed Spectrum

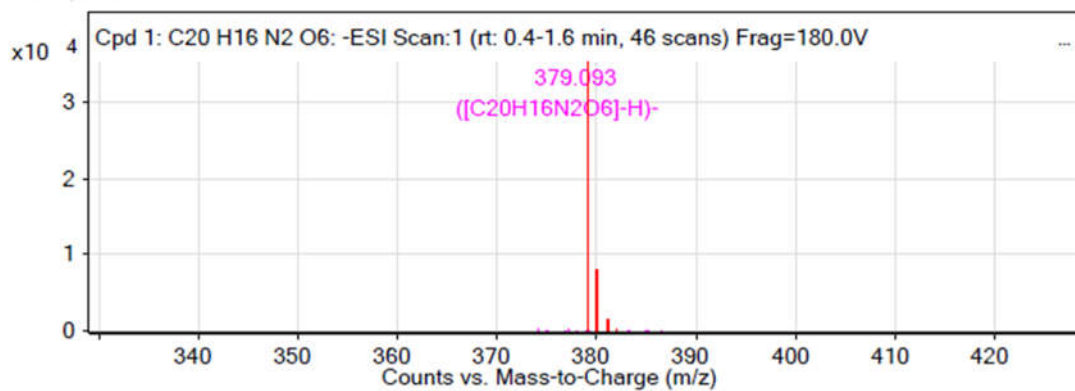

MS Spectrum Peak List

| m/z     | Calc m/z | Diff (ppm) | z | Abund    | Formula    | Ion    |
|---------|----------|------------|---|----------|------------|--------|
| 379.093 | 379.094  | 0.16       | 1 | 35212.06 | C20H16N2O6 | [M-H]- |
| 380.099 | 380.097  | 0.77       | 1 | 7288.87  | C20H16N2O6 | [M-H]- |
| 381.099 | 381.099  | 1.22       | 1 | 1100.89  | C20H16N2O6 | [M-H]- |
| 382.102 | 382.102  | -0.91      | 1 | 113.14   | C20H16N2O6 | [M-H]- |

--- End Of Report ---

## Qualitative Analysis Report

### User Spectra

| Spectrum Source          | Fragmentor Voltage | Collision Energy | Ionization Mode |
|--------------------------|--------------------|------------------|-----------------|
| Peak (1) in "- TIC Scan" | 250                | 0                | ESI             |

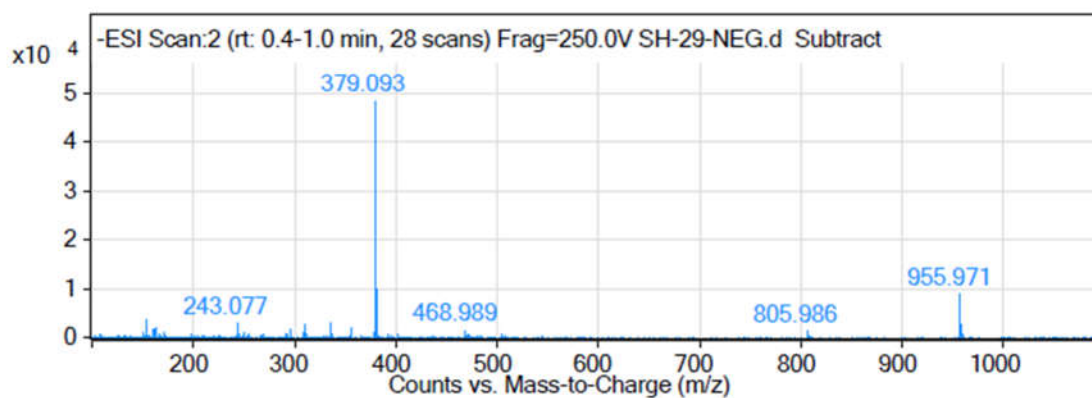

#### Peak List

| m/z     | z | Abund    |
|---------|---|----------|
| 92.928  |   | 1505.03  |
| 94.925  |   | 1277.5   |
| 108.045 |   | 726.11   |
| 151.004 |   | 788.85   |
| 153.019 |   | 3569.66  |
| 159.056 |   | 1416.09  |
| 160.842 |   | 1710.21  |
| 162.839 |   | 1740.31  |
| 164.836 |   | 667.46   |
| 170.944 |   | 868.28   |
| 199.087 |   | 759.8    |
| 243.077 | 1 | 3133.6   |
| 251.082 |   | 1016.61  |
| 255.077 |   | 764.34   |
| 295.072 |   | 1648.5   |
| 309.088 |   | 915.39   |
| 311.103 | 1 | 2854.08  |
| 335.103 | 1 | 3125.65  |
| 336.107 | 1 | 727.27   |
| 337.084 |   | 694.88   |
| 355.093 |   | 1781.02  |
| 377.075 |   | 1075.16  |
| 379.093 | 1 | 48275.35 |
| 380.096 | 1 | 9793.72  |
| 381.099 | 1 | 1617.79  |

|         |         |
|---------|---------|
| 468.989 | 1390.2  |
| 805.986 | 1208.88 |
| 955.971 | 9066.02 |
| 956.973 | 1638    |
| 957.968 | 2933.25 |



# Compounds

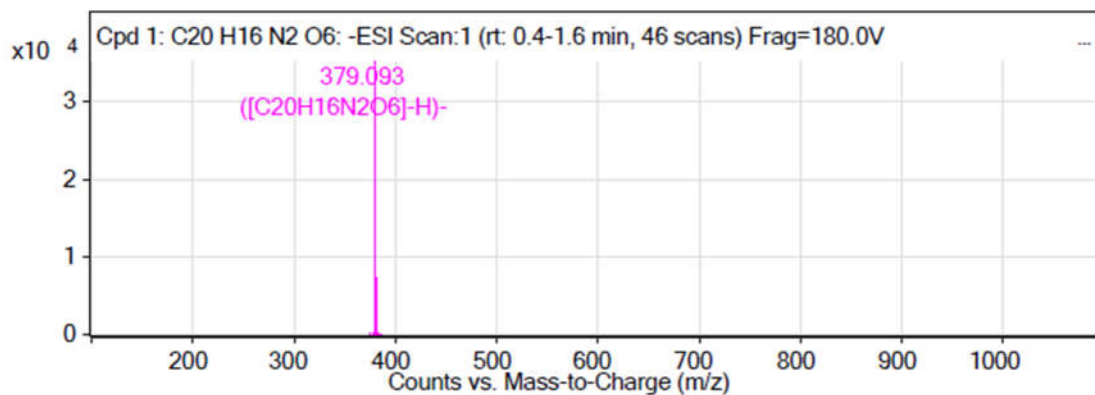

## Peak List

| m/z     | z | Abund    | Formula                                                       | Ion    |
|---------|---|----------|---------------------------------------------------------------|--------|
| 379.093 | 1 | 35212.06 | C <sub>20</sub> H <sub>16</sub> N <sub>2</sub> O <sub>6</sub> | (M-H)- |
| 380.096 | 1 | 7288.87  | C <sub>20</sub> H <sub>16</sub> N <sub>2</sub> O <sub>6</sub> | (M-H)- |
| 381.099 | 1 | 1100.89  | C <sub>20</sub> H <sub>16</sub> N <sub>2</sub> O <sub>6</sub> | (M-H)- |
| 382.102 | 1 | 113.14   | C <sub>20</sub> H <sub>16</sub> N <sub>2</sub> O <sub>6</sub> | (M-H)- |

--- End Of Report ---

5-oxo-1-(4-((2,4,6-trihydroxybenzylidene)amino)phenyl)pyrrolidine-3-carboxylic acid, **SK-119**

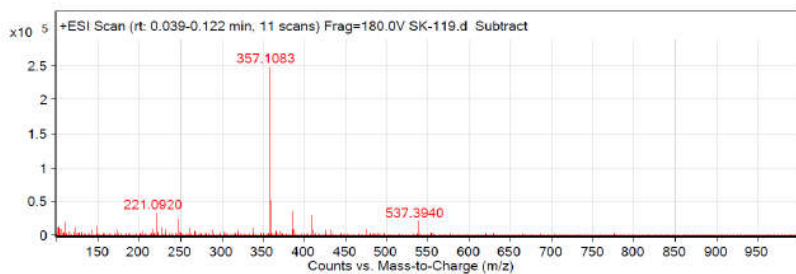

Peak List

| m/z      | z | Abund    |
|----------|---|----------|
| 54.9468  |   | 4160.51  |
| 55.9344  |   | 5869.46  |
| 56.9419  |   | 64186.87 |
| 72.937   |   | 12550.21 |
| 81.9371  |   | 48367.74 |
| 83.9404  |   | 5330.04  |
| 84.9463  |   | 5975.98  |
| 85.9415  |   | 6384.69  |
| 87.0441  |   | 14745.55 |
| 89.0595  |   | 3620.91  |
| 95.9525  |   | 5388.94  |
| 95.9731  |   | 4318.41  |
| 97.9684  |   | 72220.02 |
| 98.9614  |   | 27334.29 |
| 99.9687  |   | 9020.65  |
| 100.9566 |   | 11021.09 |
| 102.1276 |   | 12685.8  |
| 103.9555 |   | 8771.66  |
| 105.0697 |   | 9720.54  |
| 108.0673 |   | 3966.32  |
| 109.9432 |   | 19460.7  |
| 114.0913 |   | 4514.68  |
| 121.0741 |   | 3867.01  |
| 122.9639 |   | 12534.44 |
| 126.9672 |   | 3780.38  |
| 130.1588 |   | 4546.47  |
| 141.9585 |   | 7713.45  |
| 149.023  |   | 13540.89 |
| 172.8616 |   | 7416.14  |
| 202.8722 |   | 6104.05  |
| 217.1054 |   | 8517.03  |
| 221.092  | 1 | 32481.44 |
| 222.096  | 1 | 4056.02  |
| 227.1256 |   | 11458.43 |

|          |   |           |
|----------|---|-----------|
| 230.8896 |   | 8376.76   |
| 246.8622 |   | 23633.44  |
| 248.8626 | 4 | 4188.94   |
| 261.1093 |   | 10435.04  |
| 261.1282 |   | 6657.95   |
| 267.1219 |   | 5732.12   |
| 288.2892 |   | 7180.11   |
| 301.1414 |   | 4964.74   |
| 318.7921 |   | 7068.65   |
| 337.1051 |   | 10102.43  |
| 357.1083 | 1 | 248457.59 |
| 358.1112 | 1 | 51375.8   |
| 359.1137 | 1 | 7545.01   |
| 365.1356 |   | 6329.38   |
| 371.0997 |   | 5591.6    |
| 385.1391 |   | 6876.68   |
| 387.1803 | 1 | 35066.03  |
| 388.1838 | 1 | 8342.91   |
| 409.1619 | 1 | 29193.48  |
| 410.1653 | 1 | 6899.88   |
| 425.1358 |   | 7783.54   |
| 432.2377 | 1 | 7886.26   |
| 475.113  | 1 | 9510.22   |
| 537.394  | 1 | 20491.01  |
| 538.3974 | 1 | 6725.91   |
| 553.3789 |   | 3628.97   |

Reference:

1. Kahremany, S.; Babaev, I.; Gvirtz, R.; Ogen-Stern, N.; Azoulay-Ginsburg, S.; Senderowitz, H.; Cohen, G.; Gruzman, A. Nrf2 Activation by SK-119 Attenuates Oxidative Stress, UVB, and LPS-Induced Damage. *Skin Pharmacol Physiol* **2019**, *32*, 173-181, doi:10.1159/000499432.
